# Supplementary material for: Estimation of mechanistic parameters in the gas-phase reactions of ozone with alkenes for use in automated mechanism construction
Source: Copernicus journal article supplement (doi:10.5194/acp-22-6167-2022), 2022-05-11
Supplement: Supplementary file 1 [file acp-22-6167-2022-supplement.zip]

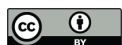

*Supplement of*

**Estimation of mechanistic parameters in the gas-phase reactions of ozone with alkenes for use in automated mechanism construction**

**Mike J. Newland et al.**

*Correspondence to:* Mike Newland (mike.newland@gmail.com) and Andrew Rickard (andrew.rickard@york.ac.uk)

- acp-22-6167-2022-supplement-title-page.pdf
- ACPNewland22\_Supplementary.pdf
- S1\_carbonyl\_yields.xlsx
- S2\_SCI\_yields.xlsx
- S3\_OH\_yields.xlsx

The copyright of individual parts of the supplement might differ from the article licence.
